# Supplementary material for: Cardioprotection of mAb2G4/ODN/lip on Myocardial Ischemia-Reperfusion Injury via Inhibiting the NF-κB Signaling Pathway
Source: Hindawi journal article supplement (doi:10.1155/2023/5034683), 2023-04-27

**Supplementary data for FIGURE 5.**

1. The full uncropped western blot gels of Actin.

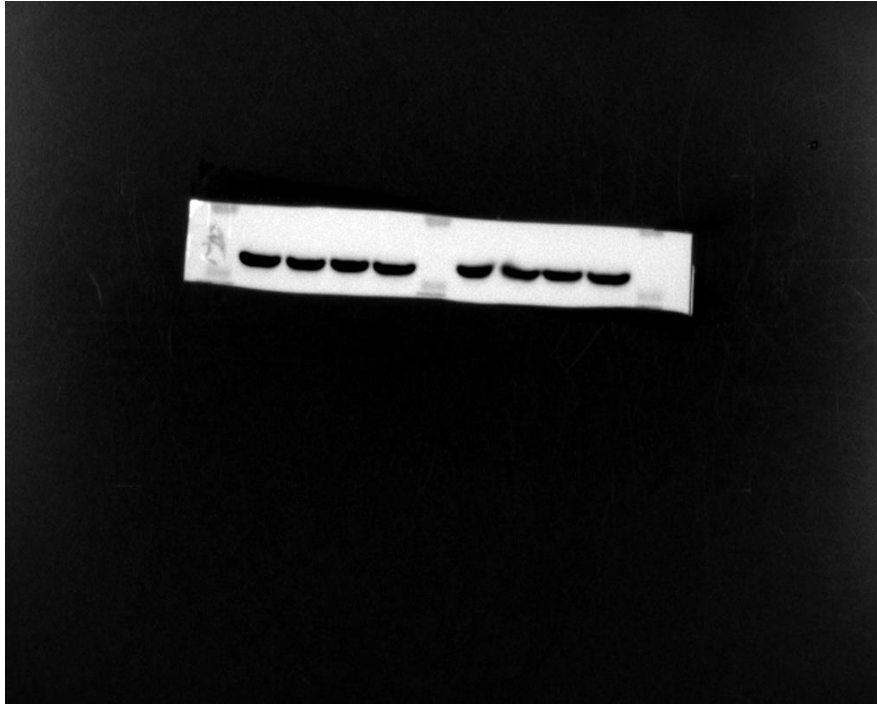

2. The full uncropped western blot gels of p-NF- $\kappa$ B

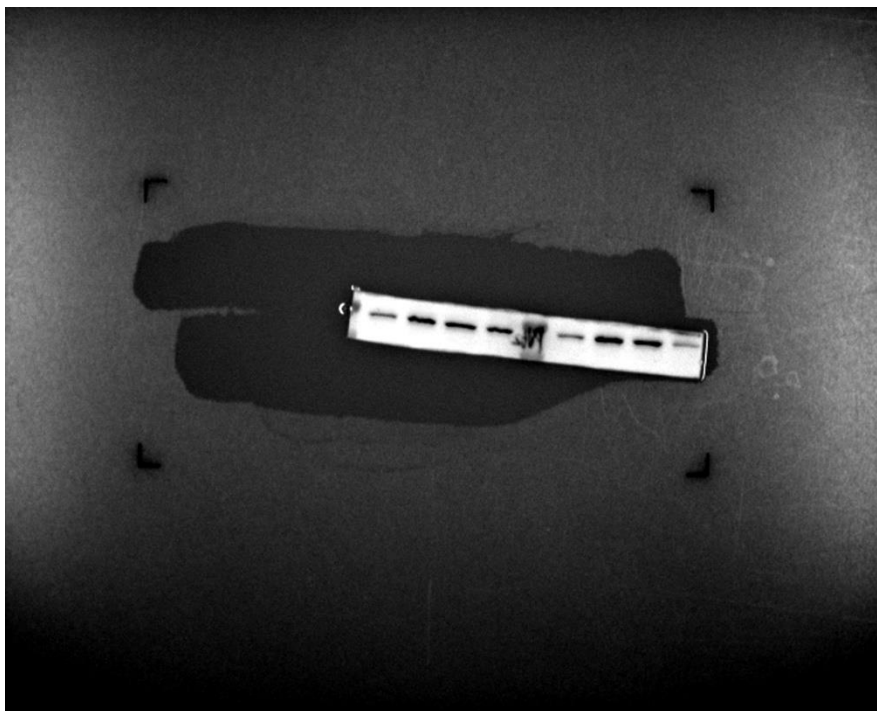

3. The full uncropped western blot gels of NLRP3

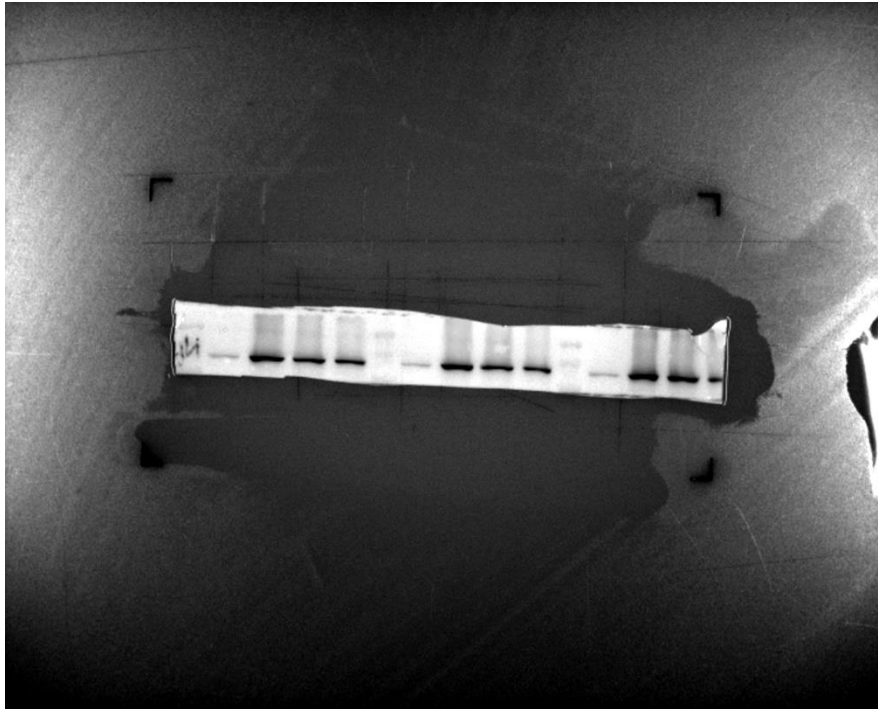

4. The full uncropped western blot gels of NF- $\kappa$ B

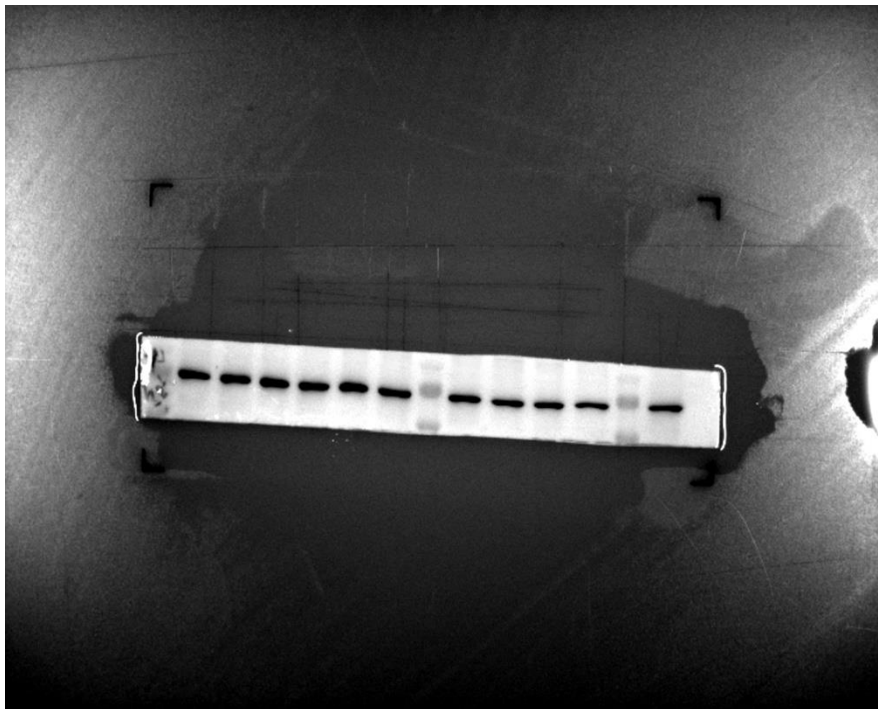

5. The full uncropped western blot gels of caspase

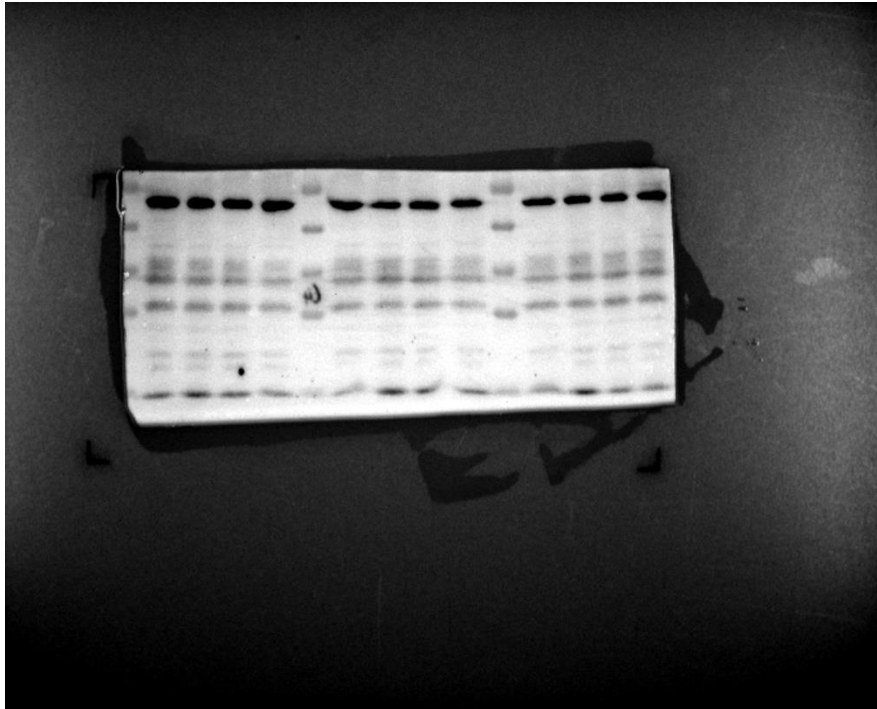

**Supplementary data for FIGURE 7.**

6. The full uncropped western blot gels of Actin.

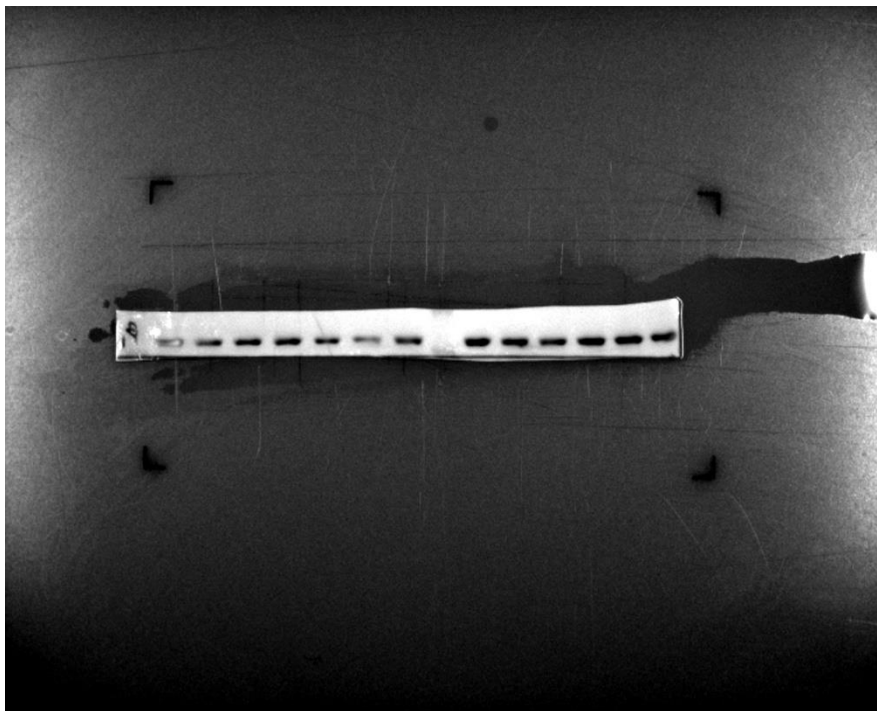

7. The full uncropped western blot gels of p-NF- $\kappa$ B

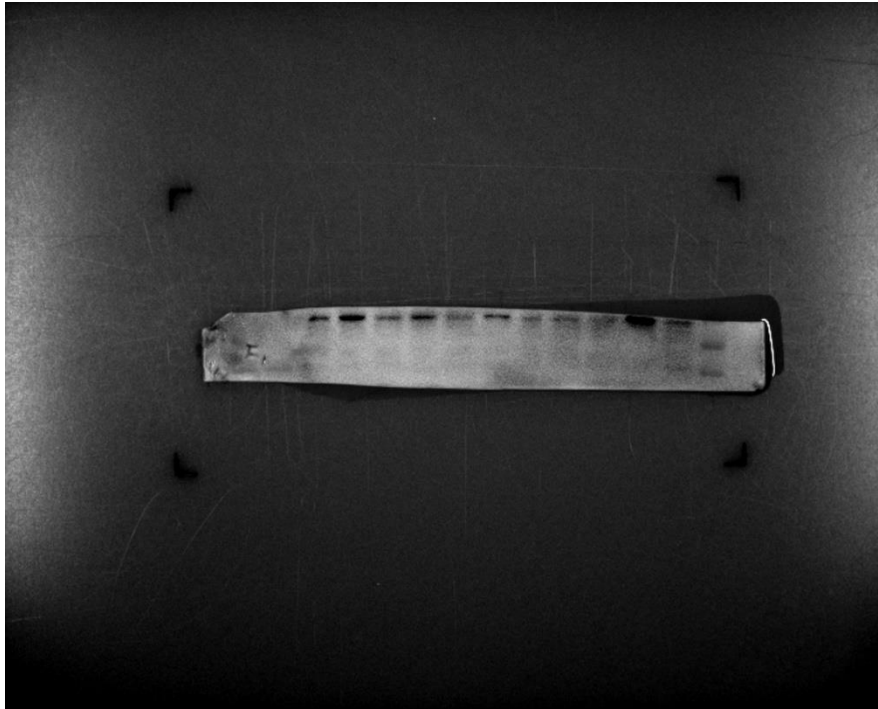

8. The full uncropped western blot gels of NLRP3

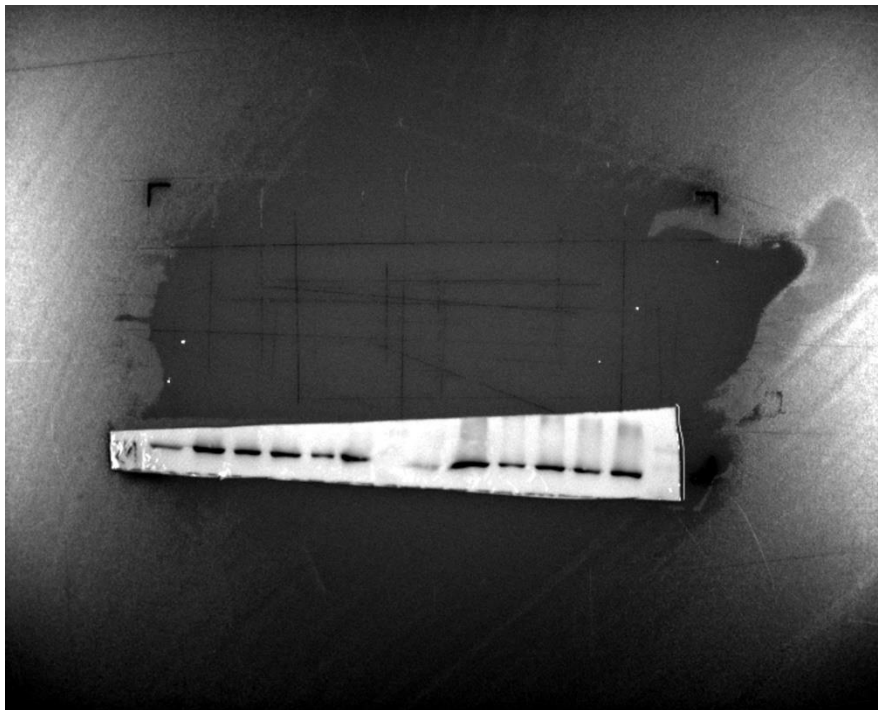

9. The full uncropped western blot gels of NF-κB

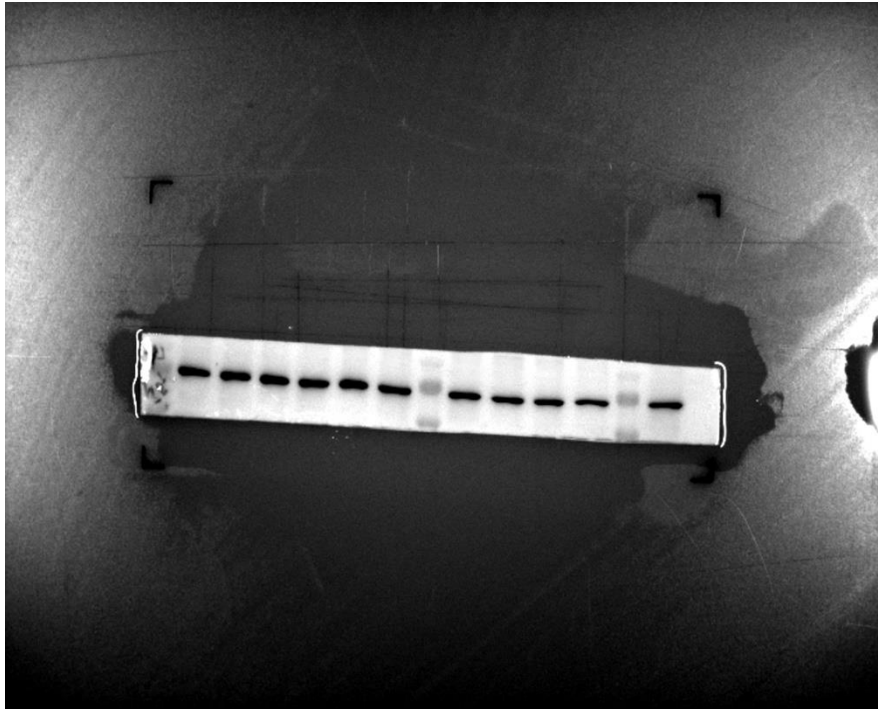

10. The full uncropped western blot gels of caspase

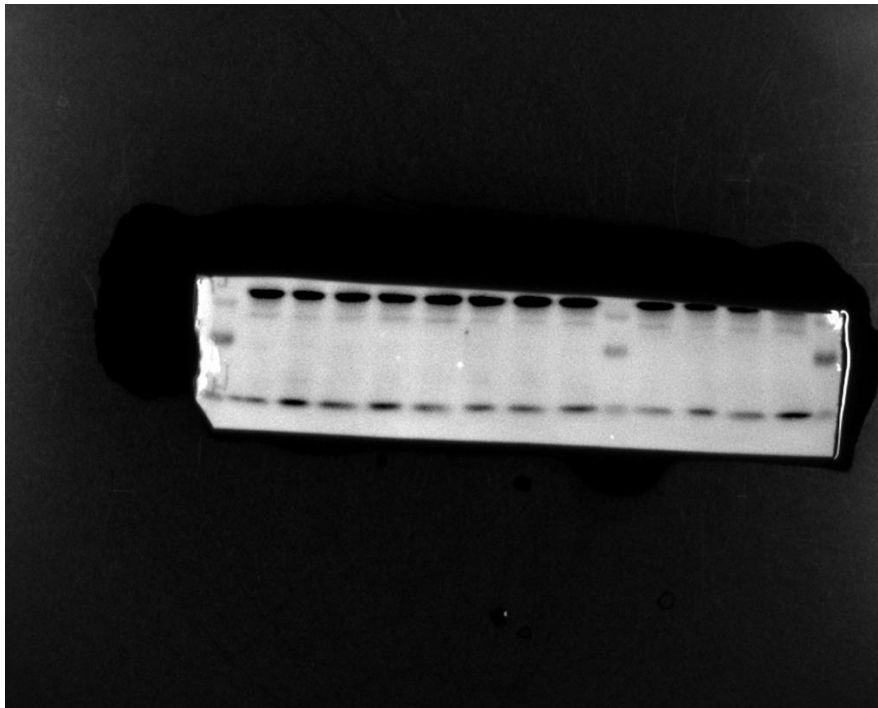

Supplement: f1 [file 5034683.f1.pdf]
